# Supplementary material for: Enhanced Methane Dry Reforming with Ni/SiO2 Catalysts Featuring Hierarchical External Nanostructures
Source: MDPI journal article supplement (doi:10.3390/catal14040265), 2024-04-16
Supplement: s1 [file s1]

## Supplementary Material

# Enhanced Methane Dry Reforming with Ni/SiO<sub>2</sub> Catalysts Featuring Hierarchical External Nanostructures

Yong Jun Kim, Min-Jae Kim, Dong Hyun Kim, Anush Mnoyan \* and Kyubock Lee \*

Graduate School of Energy Science and Technology, Chungnam National University,  
99 Daehak-ro, Yuseong-gu, Daejeon 34134, Republic of Korea;  
yjkimrelentless@gmail.com (Y.J.K.)

\* Correspondence: anush.mnoyan@cnu.ac.kr (A.M.); kyubock.lee@cnu.ac.kr (K.L.);  
Tel.: +82-42-821-8610 (A.M. & K.L.)

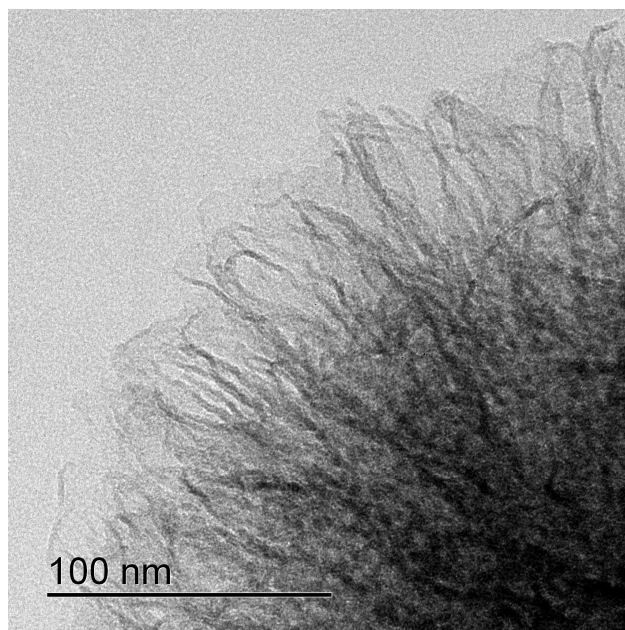

**Figure S1. TEM image of reduced Ni/DMS.**

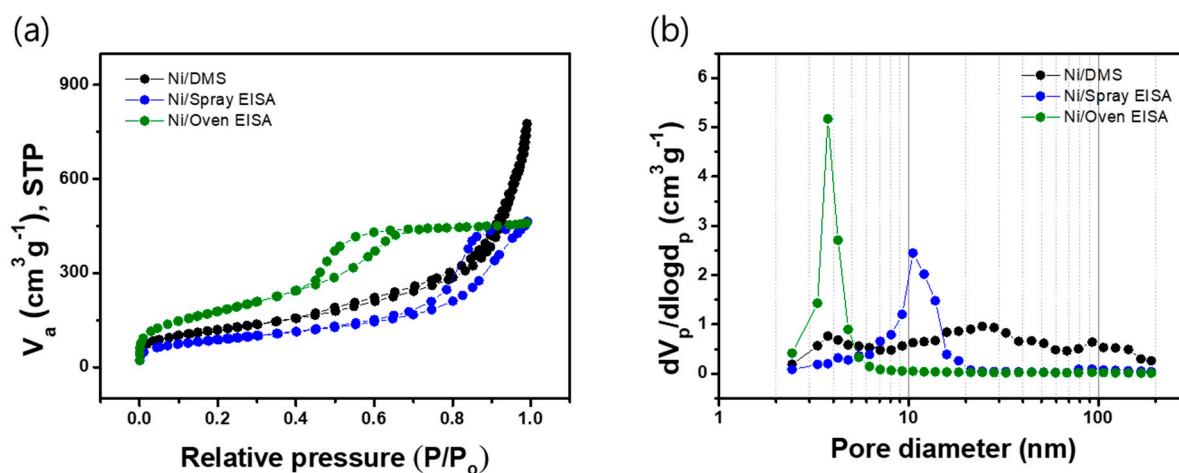

Figure S2. (a)  $\text{N}_2$  adsorption/desorption isotherms and (b) pore size distribution of the calcined Ni/DMS, Ni/Spray EISA, and Ni/Oven EISA.

**Table S1.** Physical properties of prepared calcined Ni/DMS, Ni/Spray-EISA and Ni/Oven-EISA catalysts.

| Samples       | Specific surface area ( $\text{m}^2/\text{g}$ ) | Pore volume ( $\text{cm}^3/\text{g}$ ) | Pore Size (nm) |
|---------------|-------------------------------------------------|----------------------------------------|----------------|
| Ni/DMS        | 428.9                                           | 1.19                                   | 11.1           |
| Ni/Spray-EISA | 316.2                                           | 0.71                                   | 9.0            |
| Ni/Oven-EISA  | 649.4                                           | 0.71                                   | 4.4            |

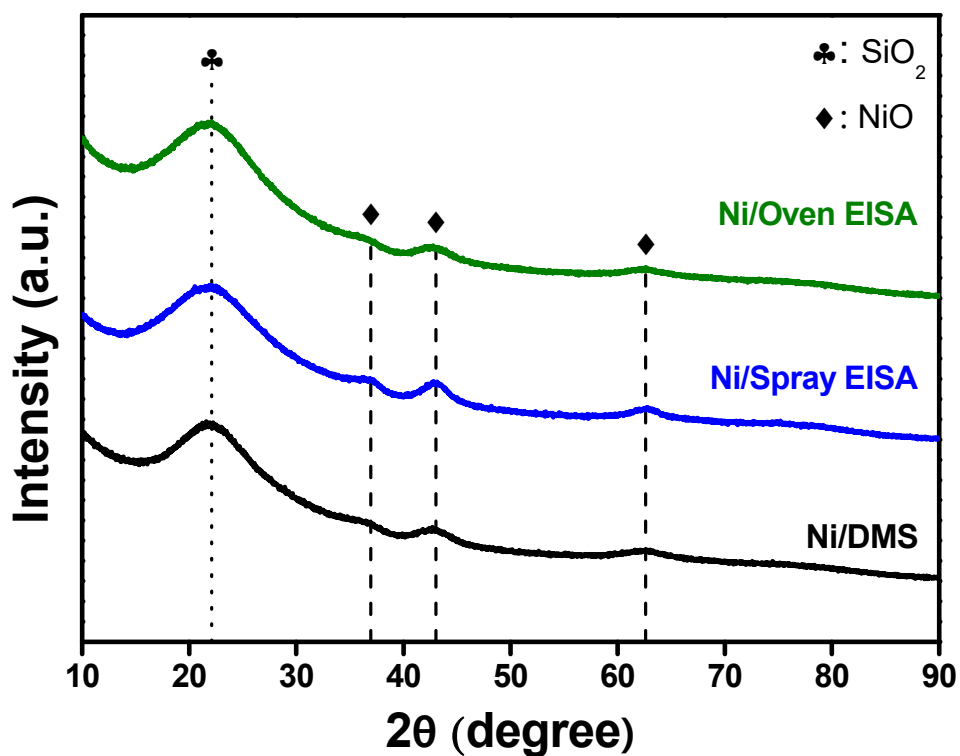

**Figure S3. XRD patterns of calcined Ni/DMS, Ni/Spray EISA, and Ni/Oven EISA.**

The Figure S3 displays typical XRD patterns of the prepared three catalyst samples. All reflections in the XRD patterns can be assigned to the face-centered cubic phase of NiO (JCPDS card no. #47-1049). The three distinctive peaks observed at 37.2°, 43.2°, and 62.8° correspond to the (111), (200), and (220) diffraction planes, respectively.

**Table S2. Comparison of DRM performance for Ni/SiO<sub>2</sub> catalysts based on the process duration.**

| Catalysts                                                    | 6 h reaction at 800 °C         |      |      |                                |      |      | Long-term reaction (24 h) at 700 °C |                                |
|--------------------------------------------------------------|--------------------------------|------|------|--------------------------------|------|------|-------------------------------------|--------------------------------|
|                                                              | CH <sub>4</sub> conversion (%) |      |      | CO <sub>2</sub> conversion (%) |      |      | CH <sub>4</sub> conversion (%)      | CO <sub>2</sub> conversion (%) |
| GHSV<br>(L·g <sub>cat</sub> <sup>-1</sup> ·h <sup>-1</sup> ) | 90                             | 180  | 360  | 90                             | 180  | 360  | 360                                 | 360                            |
| Ni/DMS                                                       | 90.9                           | 88.1 | 76.6 | 96.7                           | 93.2 | 82.1 | 29.9                                | 36.9                           |
| Ni/Spray<br>EISA                                             | 88.8                           | 85.2 | 67.1 | 95.7                           | 90.2 | 72.8 | 23.9                                | 32.3                           |
| Ni/Oven EISA                                                 | 89.9                           | 82.6 | 63.5 | 95.3                           | 87.6 | 68.6 | 21.3                                | 27.1                           |

Regardless of the reaction flow rates, the Ni/DMS catalyst consistently demonstrated the highest conversion. Over the course of extended (24-hour) reaction experiments, all catalysts maintained stable conversion rates, with Ni/DMS consistently outperforming the others.
